# Supplementary material
Source: ML conference proceedings conference paper supplement (https://openaccess.thecvf.com/content/CVPR2022/html/Pang_Two_Coupled_Rejection_CVPR_2022_paper.html)
Supplement: Supplementary file 1 [file Pang_Two_Coupled_Rejection_CVPR_2022_supplemental.pdf]

# Appendix: Two Coupled Rejection Metrics Can Tell Adversarial Examples Apart

Tianyu Pang<sup>1</sup>, Huishuai Zhang<sup>2</sup>, Di He<sup>2</sup>, Yinpeng Dong<sup>1</sup>, Hang Su<sup>1</sup>, Wei Chen<sup>3</sup>, Jun Zhu<sup>1\*</sup>, Tie-Yan Liu<sup>2</sup>

<sup>1</sup>Dept. of Comp. Sci. and Tech., Institute for AI, BNRist Center, THBI Lab, Tsinghua University <sup>2</sup>MSRA <sup>3</sup>ICT, CAS

{pty17, dyp17}@emails.tsinghua.edu.cn, {suhangss, dcszj}@tsinghua.edu.cn, {huishuai.zhang, dihe, wche, tyliu}@microsoft.com

## A. Proof

In this section, we provide proofs for the proposed Theorem 1, and Theorem 2.

### A.1. Proof of Theorem 1

*Proof.* The conditions in Theorem 1 can be written as  $f_\theta(x_1)[y_1^m] > \frac{1}{2-\xi}$ ,  $y_1^m = y_1$  and  $f_\theta(x_2)[y_2^m] > \frac{1}{2-\xi}$ ,  $y_2^m \neq y_2$ , where  $\xi \in [0, 1)$ . Since  $A_\phi(x)$  is  $\xi$ -error at  $x_1$  and  $x_2$ , according to Definition 1, at least one of the bounds holds for  $x_1$  and  $x_2$ , respectively:

$$\text{Bound (i): } \left| \log \left( \frac{A_\phi(x)}{A_\phi^*(x)} \right) \right| \leq \log \left( \frac{2}{2-\xi} \right);$$

$$\text{Bound (ii): } |A_\phi(x) - A_\phi^*(x)| \leq \frac{\xi}{2}.$$

For  $x_1$ , there is  $A_\phi^*(x_1) = 1$ . Then if bound (i) holds, we can obtain

$$\begin{aligned} \text{R-Con}(x_1) &= f_\theta(x_1)[y_1^m] \cdot A_\phi(x_1) \\ &> f_\theta(x_1)[y_1^m] \cdot \frac{2-\xi}{2} \\ &> \frac{1}{2-\xi} \cdot \frac{2-\xi}{2} = \frac{1}{2}, \end{aligned}$$

and if bound (ii) holds, we can obtain

$$\begin{aligned} \text{R-Con}(x_1) &= f_\theta(x_1)[y_1^m] \cdot A_\phi(x_1) \\ &> f_\theta(x_1)[y_1^m] \cdot \left( 1 - \frac{\xi}{2} \right) \\ &> \frac{1}{2-\xi} \cdot \frac{2-\xi}{2} = \frac{1}{2}. \end{aligned}$$

Similarly for  $x_2$ , there is  $f_\theta(x_2)[y_2^m] \cdot A_\phi^*(x_2) = f_\theta(x_2)[y_2]$ .

Then if bound (i) holds, we can obtain

$$\begin{aligned} \text{R-Con}(x_2) &= f_\theta(x_2)[y_2^m] \cdot A_\phi(x_2) \\ &= f_\theta(x_2)[y_2^m] \cdot A_\phi^*(x_2) \cdot \frac{A_\phi(x_2)}{A_\phi^*(x_2)} \\ &< f_\theta(x_2)[y_2] \cdot \frac{2}{2-\xi} \\ &< \left( 1 - \frac{1}{2-\xi} \right) \cdot \frac{2}{2-\xi} \\ &= \frac{2-2\xi}{(2-\xi)^2} < \frac{1}{2}, \end{aligned}$$

where it is easy to verify that  $\frac{2-2\xi}{(2-\xi)^2}$  is monotone decreasing in the interval of  $\xi \in [0, 1)$ . If bound (ii) holds for  $x_2$ , we can obtain

$$\begin{aligned} \text{R-Con}(x_2) &= f_\theta(x_2)[y_2^m] \cdot A_\phi(x_2) \\ &< f_\theta(x_2)[y_2^m] \cdot \left( \frac{f_\theta(x_2)[y_2]}{f_\theta(x_2)[y_2^m]} + \frac{\xi}{2} \right) \\ &= f_\theta(x_2)[y_2] + f_\theta(x_2)[y_2^m] \cdot \frac{\xi}{2} \\ &= f_\theta(x_2)[y_2] \cdot \left( 1 - \frac{\xi}{2} \right) + (f_\theta(x_2)[y_2] + f_\theta(x_2)[y_2^m]) \cdot \frac{\xi}{2} \\ &< \left( 1 - \frac{1}{2-\xi} \right) \cdot \left( 1 - \frac{\xi}{2} \right) + \frac{\xi}{2} = \frac{1}{2}. \end{aligned}$$

Thus we have proven  $\text{R-Con}(x_1) > \frac{1}{2} > \text{R-Con}(x_2)$ .  $\square$

### A.2. Proof of Theorem 2

*Proof.* Since  $A_\phi^*(x)$  is naturally bounded in  $[0, 1]$  for any input  $x$ , and  $A_\phi(x)$  is bounded in  $[0, 1]$  by model design, we denote  $\{B_0, B_1, \dots, B_S\}$  as  $S+1$  points in  $[0, 1]$ , where  $B_0 = 0$  and  $B_S = 1$ . These  $S+1$  points induce  $S$  bins or intervals, i.e.,  $I_s = [B_{s-1}, B_s]$  for  $s = 1, \dots, S$ . When  $A_\phi(x)$  is  $\xi$ -error at  $x$ , we consider the cases of bound (i) and bound (ii) hold, respectively, as detailed below:

**Bound (i) holds.** We construct the bins in a geometric manner, where  $B_s = \frac{2}{2-\xi} \cdot B_{s-1}$  and we set  $B_1 = \rho$  be a

\*Corresponding author.

rounding error. Note that we have

$$\rho \cdot \left(\frac{2}{2-\xi}\right)^{S-2} < 1 \leq \rho \cdot \left(\frac{2}{2-\xi}\right)^{S-1},$$

thus we can derive that

$$S = \left\lceil \frac{\log \rho^{-1}}{\log \left(\frac{2}{2-\xi}\right)} \right\rceil + 1.$$

It is easy to find that if  $A_\phi(x)$  and  $A_\phi^*(x)$  locate in the same bin, then bound (i) holds. Therefore, this regression task can be substituted by a classification task of classes  $N_1 = \left\lceil \frac{\log \rho^{-1}}{\log \left(\frac{2}{2-\xi}\right)} \right\rceil + 1$ .

**Bound (ii) holds.** In this case, we construct the bins in an arithmetic manner, where  $B_s = B_{s-1} + \frac{\xi}{2}$ . Then we have

$$(S-1) \cdot \frac{\xi}{2} < 1 \leq S \cdot \frac{\xi}{2},$$

thus we can derive that

$$S = \left\lceil \frac{2}{\xi} \right\rceil.$$

It is easy to find that if  $A_\phi(x)$  and  $A_\phi^*(x)$  locate in the same bin, then bound (ii) holds. So this regression task can be substituted by a classification task of classes  $N_2 = \left\lceil \frac{2}{\xi} \right\rceil$ .  $\square$

## B. More backgrounds

**Adversarial training.** In recent years, adversarial training (AT) has become the critical ingredient for the state-of-the-art robust models [10, 16, 18]. Many variants of AT have been proposed via adopting the techniques like ensemble learning [45, 59, 67], metric learning [31, 41], generative modeling [28, 61], curriculum learning [5], semi-supervised learning [2, 8], and self-supervised learning [11, 12, 27, 43]. Other efforts include tuning AT mechanisms by universal perturbations [47, 52], reweighting misclassified samples [63, 73] or multiple threat models [40, 58]. Accelerating the training procedure of AT is another popular research routine, where recent progresses involve reusing the computations [51, 71], adaptive adversarial steps [62, 72] or one-step training [3, 30, 32, 64].

**Adversarial detection.** Instead of correctly classifying adversarial inputs, another complementary research routine aims to detect / reject them [15, 25, 34, 35, 42, 49, 70]. Previous detection methods mainly fall into two camps, i.e., statistic-based and model-based. Statistic-based methods stem from the features learned by standardly trained models. These statistics include density ratio [22], kernel density [20, 44], prediction variation [66], mutual information [53, 54], Fisher information [74], local intrinsic dimension [38], activation

invariance [37], and feature attributions [57, 68]. As for the model-based methods, the auxiliary detector could be a sub-network [9, 13, 55], a Gaussian mixture model [1, 29, 36], or an additional generative model [4, 19, 50].

## C. More analyses

In this section, we provide implementation details of the BCE loss, toy examples to intuitively illustrate the effects of temperature tuning, and analyze the role of T-Con in randomized classifiers.

### C.1. Implementation of the BCE loss

For notation simplicity, we generally denote the BCE objective as

$$\text{BCE}(f \parallel g) = -g_\dagger \cdot \log f - (1 - g_\dagger) \cdot \log(1 - f), \quad (1)$$

where the subscript  $\dagger$  indicates stopping gradients, an operation usually used to stabilize the training processes [24]. We show that the stopping-gradient operations can lead to unbiased optimal solution for the classifier. Specifically, taking PGD-AT+RR as an example, the training objective is minimizing

$$\mathbb{E}_{p(x,y)} [\mathcal{L}_{\text{CE}}(f_\theta(x), y) + \text{BCE}(f_\theta(x)[y^m] \cdot A_\phi(x) \parallel f_\theta(x)[y])]$$

w.r.t.  $\phi$  and  $\theta$ , where we use  $p(x, y)$  to represent adversarial data distribution. Note that the optimal solution of minimizing  $\mathcal{L}_{\text{CE}}(f_\theta(x), y)$  is  $f_\theta(x)[y] = p(y|x)$ , but if we do not stop gradients of  $f_\theta(x)[y]$  in the RR term (BCE loss), then the optimal  $\theta$  of the entire PGD-AT+RR objective no longer satisfies  $f_\theta(x)[y] = p(y|x)$ , i.e., in this case RR will introduce bias on the optimal solution of classifier. Thus, stopping gradients on  $f_\theta(x)[y]$  in the RR term can avoid affecting the training of classifier.

### C.2. Toy examples on temperature tuning

Assume that there are three classes, and the confidence / T-Con on  $x_1$  and  $x_2$  are

$$\mathcal{M}(x_1; \tau) = \frac{e^{\frac{a_1}{\tau}}}{e^{\frac{a_1}{\tau}} + e^{\frac{b_1}{\tau}} + e^{\frac{c_1}{\tau}}}; \quad \mathcal{M}(x_2; \tau) = \frac{e^{\frac{a_2}{\tau}}}{e^{\frac{a_2}{\tau}} + e^{\frac{b_2}{\tau}} + e^{\frac{c_2}{\tau}}}.$$

Let  $a_1 = a_2 = 0$ ,  $b_1 = 3$ ,  $c_1 = -1000$ ,  $b_2 = c_2 = 2$ , it is easy to numerically compute that

$$\mathcal{M}(x_1; \tau = 1) < \mathcal{M}(x_2; \tau = 1);$$

$$\mathcal{M}(x_1; \tau = 2) > \mathcal{M}(x_2; \tau = 2).$$

This mimics the case of T-Con for misclassified inputs. We can simply choose  $a_1 = a_2 = 0$ ,  $b_1 = -1$ ,  $c_1 = -1000$ ,  $b_2 = c_2 = -2$  to mimic the case of confidence.

Table 1. Results of different hyperparameters for the KD and LID methods on CIFAR-10, under  $(\ell_\infty, 8/255)$  threat model. For KD, we restore the features on 1,000 correctly classified training samples in each class. For LID, we restore the features on totally 10,000 correctly classified training samples.

| Method | Hyperparameters    | ROC-AUC      |              |
|--------|--------------------|--------------|--------------|
|        |                    | Clean        | PGD-10       |
| KD     | $\sigma = 10^{-1}$ | 0.562        | 0.545        |
|        | $\sigma = 10^{-2}$ | 0.609        | 0.581        |
|        | $\sigma = 10^{-3}$ | <b>0.618</b> | <b>0.587</b> |
| LID    | $K = 100$          | 0.686        | 0.622        |
|        | $K = 200$          | 0.699        | 0.638        |
|        | $K = 300$          | 0.706        | 0.648        |
|        | $K = 400$          | 0.710        | 0.654        |
|        | $K = 500$          | <b>0.712</b> | 0.658        |
|        | $K = 600$          | 0.711        | <b>0.661</b> |
|        | $K = 700$          | 0.709        | 0.661        |
|        | $K = 800$          | 0.706        | 0.660        |
|        | $K = 1000$         | 0.695        | 0.653        |
|        | $K = 2000$         | 0.603        | 0.590        |

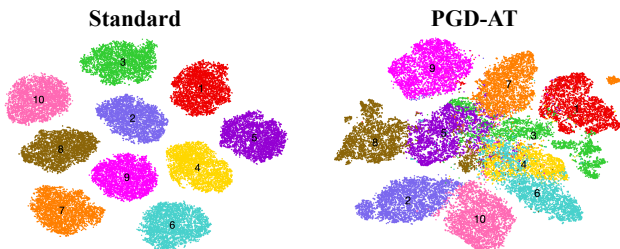

Figure 1. t-SNE visualization of the learned features on CIFAR-10. The irregular distributions of adversarially learned features make previous statistic-based detection methods less effective.

### C.3. The role of T-Con in randomized classifiers

It has been shown that randomized classifiers like Bayesian neural networks (BNNs) [34, 48] and DNNs with randomized smoothing [14] can benefit adversarial robustness. In practice, these methods are usually implemented by a Monte-Carlo ensemble with finite sampled weights or inputs. We construct an abstract classification process that involves both deterministic and randomized classifiers.

Specifically, the returned label  $y^s$  is sampled from a categorical distribution as  $p(y^s = l) = f_\theta(x)[l]$ , where in this case,  $f_\theta(x)$  is a deterministic mapping either explicitly (e.g., for DNNs) or implicitly (e.g., for BNNs) defined. For example, considering a BNN  $g_\omega(x)$  where  $\omega \sim q_\theta(\omega)$ , the

Table 2. Results of different hyperparameters for the KD and LID methods on CIFAR-100. The basic settings are the same as in Table 1, except that for KD, we restore 100 correctly classified training features in each class.

| Method | Hyperparameters    | ROC-AUC      |              |
|--------|--------------------|--------------|--------------|
|        |                    | Clean        | PGD-10       |
| KD     | $\sigma = 10^1$    | 0.522        | 0.517        |
|        | $\sigma = 1$       | <b>0.549</b> | <b>0.532</b> |
|        | $\sigma = 10^{-1}$ | 0.500        | 0.479        |
|        | $\sigma = 10^{-2}$ | 0.473        | 0.453        |
|        | $\sigma = 10^{-3}$ | 0.477        | 0.457        |
| LID    | $K = 10$           | 0.662        | 0.652        |
|        | $K = 20$           | <b>0.674</b> | <b>0.668</b> |
|        | $K = 40$           | 0.672        | 0.667        |
|        | $K = 60$           | 0.668        | 0.661        |
|        | $K = 80$           | 0.659        | 0.652        |
|        | $K = 100$          | 0.652        | 0.644        |
|        | $K = 200$          | 0.615        | 0.607        |
|        | $K = 300$          | 0.584        | 0.578        |
|        | $K = 400$          | 0.559        | 0.551        |
|        | $K = 500$          | 0.537        | 0.529        |

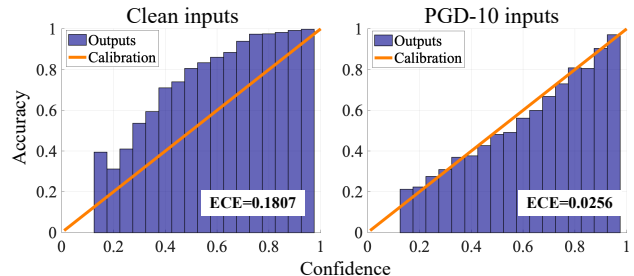

Figure 2. Reliability diagrams for an adversarially trained ResNet-18 on CIFAR-10, and the expected calibration error (ECE) [26]. The model outputs are well calibrated.

induced  $f_\theta(x)$  can be written as

$$f_\theta(x)[l] = p \left( l = \arg \max_{y_s} \sum_{n=1}^N g_{\omega_n}(y_s|x) \right), \quad (2)$$

which is the probability measure that the returned label is  $l$  from the Bayes ensemble  $\sum_{n=1}^N g_{\omega_n}(y_s|x)$ , under the distributions of  $\omega_n \sim q_\theta(\omega)$ ,  $n \in \{1, \dots, N\}$ . In practice, we can obtain empirical estimations on these implicitly defined  $f_\theta(x)$  by sampling.

By presetting the temperature  $\tau$ , the expected accuracy of the returned labels can be written as

$$A_\tau = \mathbb{E}_{p(x,y)} \mathbb{E}_{y^s} [\mathbf{1}_{y^s=y}] = \mathbb{E}_{p(x,y)} [f_\theta(x)[y]], \quad (3)$$

Table 3. Classification accuracy (%) and the ROC-AUC scores on CIFAR-100 under PGD-10 attacks. For KD, we restore the features on 100 correctly classified training samples in each class and use  $\sigma = 1$ . For LID, we restore the features on totally 10,000 correctly classified training samples and use  $K = 20$ . For SNet, the  $\lambda = 8$  and coverage is 0.7. For EBD, there is  $m_{in} = 6$  and  $m_{out} = 3$ .

| Rejector                                | Clean        |              | $\ell_\infty, 8/255$ |              | $\ell_\infty, 16/255$ |              | $\ell_2, 128/255$ |              |
|-----------------------------------------|--------------|--------------|----------------------|--------------|-----------------------|--------------|-------------------|--------------|
|                                         | TPR-95       | AUC          | TPR-95               | AUC          | TPR-95                | AUC          | TPR-95            | AUC          |
| <b>Architecture backbone: ResNet-18</b> |              |              |                      |              |                       |              |                   |              |
| KD                                      | 58.20        | 0.549        | 30.23                | 0.532        | 16.39                 | 0.510        | 40.67             | 0.539        |
| LID                                     | 59.49        | 0.674        | 31.60                | 0.668        | 16.86                 | 0.661        | 42.01             | 0.658        |
| GDA                                     | 57.06        | 0.416        | 29.67                | 0.412        | 16.17                 | 0.410        | 39.83             | 0.416        |
| GDA*                                    | 58.98        | 0.599        | 31.40                | 0.593        | 17.04                 | 0.588        | 42.10             | 0.596        |
| GMM                                     | 58.06        | 0.518        | 30.48                | 0.505        | 16.69                 | 0.508        | 40.68             | 0.511        |
| SNet                                    | 59.68        | 0.729        | 33.12                | 0.743        | 19.48                 | 0.759        | 42.72             | 0.726        |
| EBD                                     | 61.44        | 0.795        | 34.56                | 0.776        | <b>20.50</b>          | 0.762        | 44.22             | 0.777        |
| <b>RR</b>                               | <b>64.44</b> | <b>0.837</b> | <b>35.52</b>         | <b>0.782</b> | 19.89                 | <b>0.767</b> | <b>47.03</b>      | <b>0.802</b> |
| <b>Architecture backbone: WRN-34-10</b> |              |              |                      |              |                       |              |                   |              |
| KD                                      | 62.04        | 0.602        | 32.59                | 0.573        | 18.19                 | 0.559        | 41.66             | 0.575        |
| LID                                     | 63.17        | 0.705        | 33.27                | 0.672        | 18.97                 | 0.652        | 42.97             | 0.672        |
| GDA                                     | 60.12        | 0.436        | 31.64                | 0.426        | 17.75                 | 0.421        | 40.52             | 0.423        |
| GDA*                                    | 62.71        | 0.601        | 33.79                | 0.605        | 18.65                 | 0.575        | 42.91             | 0.602        |
| GMM                                     | 61.80        | 0.519        | 33.33                | 0.520        | 18.95                 | 0.529        | 42.27             | 0.513        |
| SNet                                    | 64.09        | 0.727        | 36.14                | 0.738        | 22.02                 | 0.753        | 44.32             | 0.713        |
| EBD                                     | 66.83        | 0.810        | 37.76                | 0.775        | 21.80                 | 0.743        | 46.80             | 0.789        |
| <b>RR</b>                               | <b>70.14</b> | <b>0.853</b> | <b>38.81</b>         | <b>0.790</b> | <b>22.20</b>          | <b>0.765</b> | <b>48.26</b>      | <b>0.801</b> |

where  $\mathbf{1}_{y^s=y}$  is the indicator function, which equals to one if  $y^s = y$  and zero otherwise. In the limiting case of  $\tau \rightarrow 0$ , the returned labels are deterministic, and the expected accuracy is  $A_0 = \mathbb{E}_{p(x,y)}[\mathbf{1}_{y^m=y}]$ , which degenerates to the traditional definition of accuracy. Note that in the adversarial setting, the Bayes optimal classifier, i.e.,  $\tau = 0$  may not be an empirically optimal choice. For example, in the cases of  $A_0 = 0$ , we can still have  $A_\tau > 0$  for the non-deterministic classifiers.

## D. More technical details and results

In this section, we provide more technical details and results. Our methods are implemented by Pytorch [46], and run on GeForce RTX 2080 Ti GPU workers. The experiments of ResNet-18 are run by single GPU, while those on WRN-34-10 are run by two GPUs in parallel.

### D.1. The MLP architecture of $A_\phi(x)$

In our experiments,  $A_\phi(x)$  is implemented by the MLP as

$$A_\phi(x) = W_2(\mathbf{ReLU}(\mathbf{BN}(W_1z + b_1))) + b_2, \quad (4)$$

where  $z$  is the feature vector shared with the classification branch,  $\mathbf{BN}$  is an 1-D batch normalization operation,  $W_1, b_1$  are the parameters of the first linear layer, and  $W_2, b_2$  are the

parameters of the second linear layer. For ResNet-18, there is  $z \in \mathbb{R}^{512}$ ,  $W_1 \in \mathbb{R}^{256 \times 512}$ ,  $b_1 \in \mathbb{R}^{256}$ ,  $W_2 \in \mathbb{R}^{1 \times 256}$ ,  $b_2 \in \mathbb{R}^1$ . For WRN-34-10, there is  $z \in \mathbb{R}^{640}$ ,  $W_1 \in \mathbb{R}^{320 \times 640}$ ,  $b_1 \in \mathbb{R}^{320}$ ,  $W_2 \in \mathbb{R}^{1 \times 320}$ ,  $b_2 \in \mathbb{R}^1$ .

Empirically, on ResNet-18, the average running time for PGD-AT is about 316 seconds per epoch, and it for PGD-AT+RR is about 320 seconds per epoch. As to the parameter sizes, saving a ResNet-18 model without/with RR branch uses 44.74 MB/45.27 MB, saving a WRN-34-10 model without/with RR branch uses 184.77 MB/185.59 MB.

### D.2. Hyperparameters for baselines

For KD, we restore 1,000 correctly classified training features in each class and use  $\sigma = 10^{-3}$ . For LID, we restore a total of 10,000 correctly classified training features and use  $K = 600$ . We calculate the mean and covariance matrix on all correctly classified training samples for GDA and GMM. For SelectiveNet, the  $\lambda = 8$  and coverage is 0.7. For EBD, there is  $m_{in} = 6$  and  $m_{out} = 3$ .

**Kernel density (KD).** In [20], KD applies a Gaussian kernel  $K(z_1, z_2) = \exp(-\|z_1 - z_2\|_2^2 / \sigma^2)$  to compute the similarity between two features  $z_1$  and  $z_2$ . There is a hyperparameter  $\sigma$  controlling the bandwidth of the kernel, i.e., the smoothness of the density estimation. In Table 1 and Table 2,

Table 4. Results of different hyperparameters for the SelectiveNet and EBD methods on CIFAR-10. The AT framework is PGD-AT, and the evaluated PGD-10 adversarial inputs are crafted with  $\epsilon = 8$ .

| Method       | Hyperparameters              | Accuracy (%) |        | ROC-AUC      |              |
|--------------|------------------------------|--------------|--------|--------------|--------------|
|              |                              | Clean        | PGD-10 | Clean        | PGD-10       |
| SelectiveNet | $\lambda = 8, c = 0.7$       | 80.57        | 53.43  | <b>0.796</b> | <b>0.730</b> |
|              | $\lambda = 8, c = 0.8$       | 82.16        | 53.90  | 0.768        | 0.716        |
|              | $\lambda = 8, c = 0.9$       | 81.33        | 53.82  | 0.757        | 0.694        |
|              | $\lambda = 16, c = 0.7$      | 81.08        | 53.62  | 0.792        | 0.725        |
|              | $\lambda = 16, c = 0.8$      | 81.72        | 53.90  | 0.782        | 0.722        |
|              | $\lambda = 16, c = 0.9$      | 82.21        | 54.08  | 0.751        | 0.701        |
|              | $\lambda = 32, c = 0.7$      | 79.98        | 53.52  | 0.793        | 0.716        |
|              | $\lambda = 32, c = 0.8$      | 80.60        | 53.71  | 0.774        | 0.711        |
|              | $\lambda = 32, c = 0.9$      | 82.48        | 53.86  | 0.750        | 0.704        |
| EBD          | $m_{in} = -5, m_{out} = -23$ | overflow     |        |              |              |
|              | $m_{in} = 6, m_{out} = 0$    | 80.71        | 52.55  | 0.831        | 0.768        |
|              | $m_{in} = 6, m_{out} = 3$    | 81.98        | 53.89  | 0.832        | 0.763        |

Table 5. Classification accuracy (%) and the ROC-AUC scores on CIFAR-10. The AT framework is PGD-AT and the model architecture is WRN-34-10. For KD, we restore 1,000 correctly classified training features in each class and use  $\sigma = 10^{-3}$ . For LID, we restore totally 10,000 correctly classified training features and use  $K = 600$ . We calculate mean and covariance matrix on all correctly classified training samples for GDA and GMM. For SNet, the  $\lambda = 8$  and coverage is 0.7. For EBD, there is  $m_{in} = 6$  and  $m_{out} = 3$ .

| Rejector  | Clean        |              | $\ell_\infty, 8/255$ |              | $\ell_\infty, 16/255$ |              | $\ell_2, 128/255$ |              |
|-----------|--------------|--------------|----------------------|--------------|-----------------------|--------------|-------------------|--------------|
|           | TPR-95       | AUC          | TPR-95               | AUC          | TPR-95                | AUC          | TPR-95            | AUC          |
| KD        | 85.51        | 0.759        | 57.26                | 0.674        | 34.87                 | 0.605        | 67.55             | 0.695        |
| LID       | 86.94        | 0.760        | 58.53                | 0.690        | 35.54                 | 0.642        | 68.62             | 0.699        |
| GDA       | 85.10        | 0.512        | 56.47                | 0.506        | 34.22                 | 0.482        | 66.79             | 0.503        |
| GDA*      | 87.16        | 0.694        | 57.62                | 0.627        | 34.66                 | 0.561        | 68.23             | 0.637        |
| GMM       | 88.36        | 0.747        | 57.98                | 0.650        | 34.79                 | 0.568        | 68.87             | 0.667        |
| SNet      | 88.30        | 0.803        | 60.07                | 0.733        | <b>37.63</b>          | 0.695        | 70.14             | 0.730        |
| EBD       | 89.63        | 0.860        | 60.96                | 0.778        | 36.92                 | <b>0.712</b> | 70.97             | 0.792        |
| <b>RR</b> | <b>90.74</b> | <b>0.897</b> | <b>61.48</b>         | <b>0.783</b> | 36.52                 | 0.698        | <b>72.00</b>      | <b>0.809</b> |

we report the ROC-AUC scores under different values of  $\sigma$ , where we restore the features of 1,000/100 correctly classified training samples in each class on CIFAR-10/CIFAR-100, respectively.

**Local intrinsic dimensionality (LID).** In [38], LID applies  $K$  nearest neighbors to approximate the dimension of local data distribution. Instead of computing LID in each mini-batch, we allow the detector to use a total of 10,000 correctly classified training data points, and treat the number of  $K$  as a hyperparameter, as tuned in Table 1 and Table 2.

**SelectiveNet (SNet).** In [21], the training objective consists of three parts, i.e., the prediction head, the selection head, and the auxiliary head. There are two hyperparameters in SelectiveNet, one is the coverage  $c$ , which is the expected value of selection outputs, another one is  $\lambda$  controlling the

relative importance of the coverage constraint. In the standard setting, [21] suggest  $\lambda = 32$  and  $c = 0.8$ , while we investigate a wider range of  $\lambda$  and  $c$  when incorporating SelectiveNet with the PGD-AT framework, as reported in Table 4.

**Energy-based detection (EBD).** In [33], the discriminative classifier is implicitly treated as an energy-based model, which returns unnormalized density estimation. The two hyperparameters in EBD are  $m_{in}$  and  $m_{out}$ , controlling the upper and lower clipping bounds for correctly and wrongly classified inputs, respectively. In Table 4, we tried the setting of  $m_{in} = -5, m_{out} = -23$  as used in the original paper, which overflows on ATMs.

### D.3. Details on attacking parameters

For **PGD attacks** [39], we use the step size of  $2/255$  under  $\ell_\infty$  threat model, and the step size of  $16/255$  under  $\ell_2$  threat model. We apply untargeted mode with 10 restarts. For **CW attacks** [7], we set the binary search steps to be 9 with the initial  $c = 0.01$ . The iteration steps for each  $c$  are 1,000 with the learning rate of 0.005. Let  $x, x^*$  be the clean and adversarial inputs with the pixels scaled to  $[0, 1]$ . The values reported for CW- $\ell_\infty$  are  $\|x - x^*\|_\infty \times 255$ , while those for CW- $\ell_2$  are  $\|x - x^*\|_2^2$ . The default settings of **AutoAttack** [17] involve 100-steps APGD-CE/APGD-DLR with 5 restarts, 100-steps FAB with 5 restarts, 5,000 query times for the square attack. For **multi-target attacks** [23], we use 100 iterations and 20 restarts for each of the 9 targeted class, thus the number of total iteration steps on each data point is  $100 \times 20 \times 9 = 18,000$ . For **GAMA attacks**, we follow the default settings used in the official code<sup>1</sup>.

### D.4. More results of WRN-34-10 and CIFAR-100

In Table 5, we use the larger model architecture of WRN-34-10 [69]. We evaluate under PGD-10 ( $\ell_\infty, \epsilon = 8/255$ ) which is seen during training, and unseen attacks with different perturbation constraint ( $\epsilon = 16/255$ ), threat model ( $\ell_2$ ). As to the baselines, we choose SNet and EBD since they perform well in the cases of training ResNet-18. In Table 3, we experiment on CIFAR-100, and similarly evaluate under different variants of PGD-10 attacks. We report the results using both ResNet-18 and WRN-34-10 model architectures.

Moreover, to exclude gradient obstruction [6], we do a sanity check by running PGD-10 against PGD-AT+RR on CIFAR-10 under  $\epsilon = \{8, 16, 32, 64, 128\}/255$ , where the model architecture is ResNet-18. The ALL accuracy (%) before rejection is  $\{54.40, 33.56, 19.80, 6.71, 0.95\}$ , which converges to zero.

### D.5. Visualization of adversarially learned features

Although statistic-based detection methods like KD, LID, GDA, and GMM have achieved good performance on STMs against *non-adaptive* or *oblivious* attacks [6], they perform much worse when combined with ATMs. To explain this phenomenon, we plot the t-SNE visualization [60] in Fig. 1 on the standardly and adversarially learned features. As seen, ATMs have much more irregular feature distributions compared to STMs, while this fact breaks the statistic assumptions and rationale of previous statistic-based detection methods. For example, GDA applying a tied covariance matrix becomes unreasonable for ATMs, and this is why after using the conditional covariance matrix, GDA\* performs better than GDA.

In Fig. 2, we also plot the reliability diagrams for an adversarially trained ResNet-18 on CIFAR-10, and we report

the expected calibration error (ECE) [26]. We can observe that the model trained by PGD-AT is well-calibrated, at least on the seen attack PGD-10, which is consistent with previous observations [56, 65].

## References

- [1] Nilesh A Ahuja, Ibrahim Ndiour, Trushant Kalyanpur, and Omesh Tickoo. Probabilistic modeling of deep features for out-of-distribution and adversarial detection. *arXiv preprint arXiv:1909.11786*, 2019. 2
- [2] Jean-Baptiste Alayrac, Jonathan Uesato, Po-Sen Huang, Alhussein Fawzi, Robert Stanforth, and Pushmeet Kohli. Are labels required for improving adversarial robustness? In *Advances in Neural Information Processing Systems (NeurIPS)*, pages 12192–12202, 2019. 2
- [3] Maksym Andriushchenko and Nicolas Flammarion. Understanding and improving fast adversarial training. In *Advances in neural information processing systems (NeurIPS)*, 2020. 2
- [4] Rushil Anirudh, Jayaraman J Thiagarajan, Bhavya Kailkhura, and Peer-Timo Bremer. Mimicgan: Robust projection onto image manifolds with corruption mimicking. *International Journal of Computer Vision (IJCV)*, pages 1–19, 2020. 2
- [5] Qi-Zhi Cai, Chang Liu, and Dawn Song. Curriculum adversarial training. In *International Joint Conference on Artificial Intelligence (IJCAI)*, pages 3740–3747, 2018. 2
- [6] Nicholas Carlini, Anish Athalye, Nicolas Papernot, Wieland Brendel, Jonas Rauber, Dimitris Tsipras, Ian Goodfellow, Aleksander Madry, and Alexey Kurakin. On evaluating adversarial robustness. *arXiv preprint arXiv:1902.06705*, 2019. 6
- [7] Nicholas Carlini and David Wagner. Towards evaluating the robustness of neural networks. In *IEEE Symposium on Security and Privacy (S&P)*, 2017. 6
- [8] Yair Carmon, Aditi Raghunathan, Ludwig Schmidt, Percy Liang, and John C Duchi. Unlabeled data improves adversarial robustness. In *Advances in Neural Information Processing Systems (NeurIPS)*, 2019. 2
- [9] Fabio Carrara, Rudy Becarelli, Roberto Caldelli, Fabrizio Falchi, and Giuseppe Amato. Adversarial examples detection in features distance spaces. In *Proceedings of the European Conference on Computer Vision (ECCV)*, 2018. 2
- [10] Jinghui Chen and Quanquan Gu. Rays: A ray searching method for hard-label adversarial attack. In *International Conference on Knowledge Discovery & Data Mining (KDD)*, 2020. 2

<sup>1</sup><https://github.com/val-iisc/GAMA-GAT>

- [11] Kejiang Chen, Yuefeng Chen, Hang Zhou, Xiaofeng Mao, Yuhong Li, Yuan He, Hui Xue, Weiming Zhang, and Nenghai Yu. Self-supervised adversarial training. In *IEEE International Conference on Acoustics, Speech and Signal Processing (ICASSP)*, pages 2218–2222. IEEE, 2020. 2
- [12] Tianlong Chen, Sijia Liu, Shiyu Chang, Yu Cheng, Lisa Amini, and Zhangyang Wang. Adversarial robustness: From self-supervised pre-training to fine-tuning. In *Conference on Computer Vision and Pattern Recognition (CVPR)*, pages 699–708, 2020. 2
- [13] Gilad Cohen, Guillermo Sapiro, and Raja Giryes. Detecting adversarial samples using influence functions and nearest neighbors. In *Conference on Computer Vision and Pattern Recognition (CVPR)*, 2020. 2
- [14] Jeremy M Cohen, Elan Rosenfeld, and J Zico Kolter. Certified adversarial robustness via randomized smoothing. In *International Conference on Machine Learning (ICML)*, 2019. 3
- [15] Francesco Crecchi, Marco Melis, Angelo Sotgiu, Davide Bacciu, and Battista Biggio. Fader: Fast adversarial example rejection. *arXiv preprint arXiv:2010.09119*, 2020. 2
- [16] Francesco Croce, Maksym Andriushchenko, Vikash Sehwal, Nicolas Flammarion, Mung Chiang, Prateek Mittal, and Matthias Hein. Robustbench: a standardized adversarial robustness benchmark. *arXiv preprint arXiv:2010.09670*, 2020. 2
- [17] Francesco Croce and Matthias Hein. Reliable evaluation of adversarial robustness with an ensemble of diverse parameter-free attacks. In *International Conference on Machine Learning (ICML)*, 2020. 6
- [18] Yinpeng Dong, Qi-An Fu, Xiao Yang, Tianyu Pang, Hang Su, Zihao Xiao, and Jun Zhu. Benchmarking adversarial robustness. In *IEEE Conference on Computer Vision and Pattern Recognition (CVPR)*, 2020. 2
- [19] Abhimanyu Dubey, Laurens van der Maaten, Zeki Yal-niz, Yixuan Li, and Dhruv Mahajan. Defense against adversarial images using web-scale nearest-neighbor search. In *IEEE Conference on Computer Vision and Pattern Recognition (CVPR)*, pages 8767–8776, 2019. 2
- [20] Reuben Feinman, Ryan R Curtin, Saurabh Shintre, and Andrew B Gardner. Detecting adversarial samples from artifacts. *arXiv preprint arXiv:1703.00410*, 2017. 2, 4
- [21] Yonatan Geifman and Ran El-Yaniv. Selectivenet: A deep neural network with an integrated reject option. In *International Conference on Machine Learning (ICML)*, 2019. 5
- [22] Lovedeep Gondara. Detecting adversarial samples using density ratio estimates. *arXiv preprint arXiv:1705.02224*, 2017. 2
- [23] Sven Gowal, Jonathan Uesato, Chongli Qin, Po-Sen Huang, Timothy Mann, and Pushmeet Kohli. An alternative surrogate loss for pgd-based adversarial testing. *arXiv preprint arXiv:1910.09338*, 2019. 6
- [24] Jean-Bastien Grill, Florian Strub, Florent Alché, Corentin Tallec, Pierre H Richemond, Elena Buchatskaya, Carl Doersch, Bernardo Avila Pires, Zhaohan Daniel Guo, Mohammad Gheshlaghi Azar, et al. Bootstrap your own latent: A new approach to self-supervised learning. In *Advances in neural information processing systems (NeurIPS)*, 2020. 2
- [25] Kathrin Grosse, Praveen Manoharan, Nicolas Papernot, Michael Backes, and Patrick McDaniel. On the (statistical) detection of adversarial examples. *arXiv preprint arXiv:1702.06280*, 2017. 2
- [26] Chuan Guo, Geoff Pleiss, Yu Sun, and Kilian Q Weinberger. On calibration of modern neural networks. In *International Conference on Machine Learning (ICML)*, 2017. 3, 6
- [27] Dan Hendrycks, Kimin Lee, and Mantas Mazeika. Using pre-training can improve model robustness and uncertainty. In *International Conference on Machine Learning (ICML)*, 2019. 2
- [28] Haoming Jiang, Zhehui Chen, Yuyang Shi, Bo Dai, and Tuo Zhao. Learning to defense by learning to attack. *arXiv preprint arXiv:1811.01213*, 2018. 2
- [29] Kimin Lee, Kibok Lee, Honglak Lee, and Jinwoo Shin. A simple unified framework for detecting out-of-distribution samples and adversarial attacks. In *Advances in Neural Information Processing Systems (NeurIPS)*, 2018. 2
- [30] Bai Li, Shiqi Wang, Suman Jana, and Lawrence Carin. Towards understanding fast adversarial training. *arXiv preprint arXiv:2006.03089*, 2020. 2
- [31] Pengcheng Li, Jinfeng Yi, Bowen Zhou, and Lijun Zhang. Improving the robustness of deep neural networks via adversarial training with triplet loss. In *International Joint Conference on Artificial Intelligence (IJCAI)*, 2019. 2
- [32] Guanxiong Liu, Issa Khalil, and Abdallah Khreishah. Using single-step adversarial training to defend iterative adversarial examples. *arXiv preprint arXiv:2002.09632*, 2020. 2
- [33] Weitang Liu, Xiaoyun Wang, John Owens, and Sharon Yixuan Li. Energy-based out-of-distribution detection. In *Advances in Neural Information Processing Systems (NeurIPS)*, 2020. 5

- [34] Xuanqing Liu, Yao Li, Chongruo Wu, and Cho-Jui Hsieh. Adv-bnn: Improved adversarial defense through robust bayesian neural network. In *International Conference on Learning Representations (ICLR)*, 2019. 2, 3
- [35] Jiajun Lu, Theerasit Issaranon, and David Forsyth. SafetyNet: Detecting and rejecting adversarial examples robustly. In *International Conference on Computer Vision (ICCV)*, pages 446–454, 2017. 2
- [36] Chengcheng Ma, Baoyuan Wu, Shibiao Xu, Yanbo Fan, Yong Zhang, Xiaopeng Zhang, and Zhifeng Li. Effective and robust detection of adversarial examples via benford-fourier coefficients. *arXiv preprint arXiv:2005.05552*, 2020. 2
- [37] Shiqing Ma and Yingqi Liu. Nic: Detecting adversarial samples with neural network invariant checking. In *Proceedings of the 26th Network and Distributed System Security Symposium (NDSS 2019)*, 2019. 2
- [38] Xingjun Ma, Bo Li, Yisen Wang, Sarah M Erfani, Sudanthi Wijewickrema, Grant Schoenebeck, Dawn Song, Michael E Houle, and James Bailey. Characterizing adversarial subspaces using local intrinsic dimensionality. In *International Conference on Learning Representations (ICLR)*, 2018. 2, 5
- [39] Aleksander Madry, Aleksandar Makelov, Ludwig Schmidt, Dimitris Tsipras, and Adrian Vladu. Towards deep learning models resistant to adversarial attacks. In *International Conference on Learning Representations (ICLR)*, 2018. 6
- [40] Pratyush Maini, Eric Wong, and Zico Kolter. Adversarial robustness against the union of multiple perturbation models. In *International Conference on Machine Learning (ICML)*, pages 6640–6650. PMLR, 2020. 2
- [41] Chengzhi Mao, Ziyuan Zhong, Junfeng Yang, Carl Vondrick, and Baishakhi Ray. Metric learning for adversarial robustness. In *Advances in Neural Information Processing Systems (NeurIPS)*, pages 478–489, 2019. 2
- [42] Jan Hendrik Metzen, Tim Genewein, Volker Fischer, and Bastian Bischoff. On detecting adversarial perturbations. In *International Conference on Learning Representations (ICLR)*, 2017. 2
- [43] Muzammal Naseer, Salman Khan, Munawar Hayat, Fahad Shahbaz Khan, and Fatih Porikli. A self-supervised approach for adversarial robustness. In *Conference on Computer Vision and Pattern Recognition (CVPR)*, pages 262–271, 2020. 2
- [44] Tianyu Pang, Chao Du, Yinpeng Dong, and Jun Zhu. Towards robust detection of adversarial examples. In *Advances in Neural Information Processing Systems (NeurIPS)*, pages 4579–4589, 2018. 2
- [45] Tianyu Pang, Kun Xu, Chao Du, Ning Chen, and Jun Zhu. Improving adversarial robustness via promoting ensemble diversity. In *International Conference on Machine Learning (ICML)*, 2019. 2
- [46] Adam Paszke, Sam Gross, Francisco Massa, Adam Lerer, James Bradbury, Gregory Chanan, Trevor Killeen, Zeming Lin, Natalia Gimelshein, Luca Antiga, et al. Pytorch: An imperative style, high-performance deep learning library. In *Advances in Neural Information Processing Systems (NeurIPS)*, pages 8024–8035, 2019. 4
- [47] Julien Perolat, Mateusz Malinowski, Bilal Piot, and Olivier Pietquin. Playing the game of universal adversarial perturbations. *arXiv preprint arXiv:1809.07802*, 2018. 2
- [48] Ambrish Rawat, Martin Wistuba, and Maria-Irina Nicolae. Adversarial phenomenon in the eyes of bayesian deep learning. *arXiv preprint arXiv:1711.08244*, 2017. 3
- [49] Kevin Roth, Yannic Kilcher, and Thomas Hofmann. The odds are odd: A statistical test for detecting adversarial examples. In *International Conference on Machine Learning (ICML)*, 2019. 2
- [50] Pouya Samangouei, Maya Kabkab, and Rama Chellappa. Defense-gan: Protecting classifiers against adversarial attacks using generative models. In *International Conference on Learning Representations (ICLR)*, 2018. 2
- [51] Ali Shafahi, Mahyar Najibi, Amin Ghiasi, Zheng Xu, John Dickerson, Christoph Studer, Larry S Davis, Gavin Taylor, and Tom Goldstein. Adversarial training for free! In *Advances in Neural Information Processing Systems (NeurIPS)*, 2019. 2
- [52] Ali Shafahi, Mahyar Najibi, Zheng Xu, John P Dickerson, Larry S Davis, and Tom Goldstein. Universal adversarial training. In *AAAI Conference on Artificial Intelligence (AAAI)*, pages 5636–5643, 2020. 2
- [53] Fatemeh Sheikholeslami, Swayambhoo Jain, and Georgios B Giannakis. Minimum uncertainty based detection of adversaries in deep neural networks. *arXiv preprint arXiv:1904.02841*, 2019. 2
- [54] Lewis Smith and Yarin Gal. Understanding measures of uncertainty for adversarial example detection. In *Conference on Uncertainty in Artificial Intelligence (UAI)*, 2018. 2
- [55] Philip Sperl, Ching-Yu Kao, Peng Chen, and Konstantin Böttinger. Dla: Dense-layer-analysis for adversarial example detection. In *IEEE European Symposium on Security and Privacy (EuroS&P)*, 2020. 2
- [56] David Stutz, Matthias Hein, and Bernt Schiele. Confidence-calibrated adversarial training: General-



- izing to unseen attacks. In *International Conference on Machine Learning (ICML)*, 2020. 6
- [57] Guanhong Tao, Shiqing Ma, Yingqi Liu, and Xiangyu Zhang. Attacks meet interpretability: Attribute-steered detection of adversarial samples. In *Advances in Neural Information Processing Systems (NeurIPS)*, 2018. 2
- [58] Florian Tramèr and Dan Boneh. Adversarial training and robustness for multiple perturbations. In *Advances in Neural Information Processing Systems (NeurIPS)*, pages 5858–5868, 2019. 2
- [59] Florian Tramèr, Alexey Kurakin, Nicolas Papernot, Dan Boneh, and Patrick McDaniel. Ensemble adversarial training: Attacks and defenses. In *International Conference on Learning Representations (ICLR)*, 2018. 2
- [60] Laurens Van der Maaten and Geoffrey Hinton. Visualizing data using t-sne. *Journal of machine learning research (JMLR)*, 9(11), 2008. 6
- [61] Huaxia Wang and Chun-Nam Yu. A direct approach to robust deep learning using adversarial networks. In *International Conference on Learning Representations (ICLR)*, 2019. 2
- [62] Yisen Wang, Xingjun Ma, James Bailey, Jinfeng Yi, Bowen Zhou, and Quanquan Gu. On the convergence and robustness of adversarial training. In *International Conference on Machine Learning (ICML)*, pages 6586–6595, 2019. 2
- [63] Yisen Wang, Difan Zou, Jinfeng Yi, James Bailey, Xingjun Ma, and Quanquan Gu. Improving adversarial robustness requires revisiting misclassified examples. In *International Conference on Learning Representations (ICLR)*, 2019. 2
- [64] Eric Wong, Leslie Rice, and J. Zico Kolter. Fast is better than free: Revisiting adversarial training. In *International Conference on Learning Representations (ICLR)*, 2020. 2
- [65] Xi Wu, Uyeong Jang, Jiefeng Chen, Lingjiao Chen, and Somesh Jha. Reinforcing adversarial robustness using model confidence induced by adversarial training. In *International Conference on Machine Learning (ICML)*, pages 5334–5342. PMLR, 2018. 6
- [66] Weilin Xu, David Evans, and Yanjun Qi. Feature squeezing: Detecting adversarial examples in deep neural networks. *arXiv preprint arXiv:1704.01155*, 2017. 2
- [67] Huanrui Yang, Jingyang Zhang, Hongliang Dong, Nathan Inkawhich, Andrew Gardner, Andrew Touchet, Wesley Wilkes, Heath Berry, and Hai Li. Dverge: Diversifying vulnerabilities for enhanced robust generation of ensembles. In *Advances in Neural Information Processing Systems (NeurIPS)*, 2020. 2
- [68] Puyudi Yang, Jianbo Chen, Cho-Jui Hsieh, Jane-Ling Wang, and Michael I Jordan. MI-loo: Detecting adversarial examples with feature attribution. In *Thirty-First AAAI Conference on Artificial Intelligence (AAAI)*, 2020. 2
- [69] Sergey Zagoruyko and Nikos Komodakis. Wide residual networks. In *The British Machine Vision Conference (BMVC)*, 2016. 6
- [70] Chiliang Zhang, Zuochang Ye, Yan Wang, and Zhimou Yang. Detecting adversarial perturbations with saliency. In *2018 IEEE 3rd International Conference on Signal and Image Processing (ICSIP)*, pages 271–275. IEEE, 2018. 2
- [71] Dinghui Zhang, Tianyuan Zhang, Yiping Lu, Zhanxing Zhu, and Bin Dong. You only propagate once: Accelerating adversarial training via maximal principle. In *Advances in Neural Information Processing Systems (NeurIPS)*, 2019. 2
- [72] Jinfeng Zhang, Xilie Xu, Bo Han, Gang Niu, Lizhen Cui, Masashi Sugiyama, and Mohan Kankanhalli. Attacks which do not kill training make adversarial learning stronger. In *International Conference on Machine Learning (ICML)*, 2020. 2
- [73] Jinfeng Zhang, Jianing Zhu, Gang Niu, Bo Han, Masashi Sugiyama, and Mohan Kankanhalli. Geometry-aware instance-reweighted adversarial training. In *International Conference on Learning Representations (ICLR)*, 2021. 2
- [74] Chenxiao Zhao, P Thomas Fletcher, Mixue Yu, Yaxin Peng, Guixu Zhang, and Chaomin Shen. The adversarial attack and detection under the fisher information metric. In *Proceedings of the AAAI Conference on Artificial Intelligence*, volume 33, pages 5869–5876, 2019. 2
